# Supplementary material for: Water-soluble fluorescent chemosensor for sorbitol based on a dicationic diboronic receptor. Crystal structure and spectroscopic studies
Source: Royal Society of Chemistry journal article supplement (doi:10.1039/d3ra06198a), 2023-01-01
Supplement: d3ra06198a1.pdf [file d3ra06198a1.pdf]

## Water-Soluble Fluorescent Chemosensor for Sorbitol based on a Dicationic Diboronic Receptor. Crystal Structure and Spectroscopic Studies

Julio Zamora-Moreno,<sup>\*a</sup> María K. Salomón-Flores,<sup>a</sup> Josue Valdes-García,<sup>a</sup> Cristian Pinzón-Vanegas,<sup>a</sup>  
Diego Martínez-Otero,<sup>ab</sup> Joaquín Barroso-Flores,<sup>ab</sup> Raúl Villamil-Ramos<sup>c</sup> Miguel A. Romero-Solano<sup>a</sup>  
and Alejandro Dorazco-González<sup>\*a</sup>

<sup>a</sup>Institute of Chemistry, National Autonomous University of Mexico, Ciudad Universitaria, México 04510, Mexico.

<sup>b</sup>Centro Conjunto de Investigación en Química Sustentable, UAEM-UNAM, Instituto de Química, Universidad Nacional Autónoma de México, C. P. 50200 Toluca, Estado de México, Mexico.

<sup>c</sup>Centro de Investigaciones Químicas-IICBA, Universidad Autónoma del Estado de Morelos, Av. Universidad 1001 Col. Chamilpa, Cuernavaca, Morelos, C.P. 62209, México

Corresponding authors: JZM, [julio\\_zm@uaem.mx](mailto:julio_zm@uaem.mx); ADG [adg@unam.mx](mailto:adg@unam.mx)

### Electronic Supplementary Information

|                                                                                                                                        |     |
|----------------------------------------------------------------------------------------------------------------------------------------|-----|
| <b>GENERAL CONDITIONS</b> .....                                                                                                        | S3  |
| <i>Synthesis of N<sup>2</sup>,N<sup>6</sup>-di(quinolin-6-yl)pyridin-2,6-dicarboxamide, 9</i> .....                                    | S4  |
| <i>Synthesis of N-(quinolin-6-yl)benzamide, 10</i> .....                                                                               | S4  |
| <i>Synthesis 6,6'-((pyridine-2,6-dicarbonyl)bis(azanediyl))bis(1-benzylquinolin-1-ium) dibromide, 12</i> .<br>.....                    | S4  |
| <i>Cristal structure of 11-SO<sub>4</sub></i> .....                                                                                    | S5  |
| <i>Table S1. Crystal data and structure refinement for 11-SO<sub>4</sub></i> .....                                                     | S5  |
| <i>Table S2. Hydrogen Bonds for 11-SO<sub>4</sub></i> .....                                                                            | S6  |
| <i>Table S3. Bond Lengths for boronic acid moieties in 11-SO<sub>4</sub></i> .....                                                     | S6  |
| <i>Table S4. Bond Angles for boronic acid moieties in 11-SO<sub>4</sub></i> .....                                                      | S7  |
| <i>Table S5. <math>\pi - \pi</math> interactions measured for 11-SO<sub>4</sub></i> .....                                              | S7  |
| <b><sup>1</sup>H and <sup>13</sup>C NMR spectra of N<sup>2</sup>,N<sup>6</sup>-di(quinolin-6-yl)pyridin-2,6-dicarboxamide, 9</b> ..... | S8  |
| <i>Fig. S1. <sup>1</sup>H NMR spectrum of compound 9 (500 MHz, DMSO-d<sub>6</sub>, 300 K)</i> .....                                    | S8  |
| <i>Fig. S2. <sup>13</sup>C{<sup>1</sup>H}NMR spectrum of compound 9 (125.7 MHz, DMSO-d<sub>6</sub>, 297 K)</i> .....                   | S8  |
| <b><sup>1</sup>H and <sup>13</sup>C NMR spectra of N-(quinolin-6-yl)benzamide, 10</b> .....                                            | S9  |
| <i>Fig. S3. <sup>1</sup>H NMR spectrum of compound 10 (300 MHz, DMSO-d<sub>6</sub>, 297 K)</i> .....                                   | S9  |
| <i>Fig. S4. <sup>13</sup>C{<sup>1</sup>H}NMR spectrum of compound 10 (75.45 MHz, DMSO-d<sub>6</sub>, 297 K)</i> .....                  | S9  |
| <b>Characterization of 3,3'-((pyridine-2,6-dicarbonyl)bis(azanediyl))bis(1-(3-boronobenzyl)quinolin-1-ium) dibromide, 11</b> .....     | S10 |
| <i>Fig. S5. <sup>1</sup>H NMR spectrum (300 MHz) of compound 11 in DMSO-d<sub>6</sub> at 298 K</i> .....                               | S11 |
| <i>Fig. S6. HSQC <sup>1</sup>H-<sup>13</sup>C 2D-NMR spectrum of compound 11 in DMSO-d<sub>6</sub> at 298 K</i> .....                  | S11 |

|                                                                                                                                                                                                                                                     |            |
|-----------------------------------------------------------------------------------------------------------------------------------------------------------------------------------------------------------------------------------------------------|------------|
| <b>Fig. S7.</b> HMBC $^1\text{H}$ - $^{13}\text{C}$ 2D-NMR spectrum of compound <b>11</b> in DMSO- $d_6$ at 298 K. ....                                                                                                                             | S12        |
| <b>Fig. S8.</b> $^{11}\text{B}$ NMR spectrum (96.3 MHz) of compound <b>11</b> in Methanol- $d_4$ at 298 K. Smoothing by average movement method, factor 5. ....                                                                                     | S12        |
| <b>Fig. S9.</b> Infrared spectrum (ATR) of compound <b>11</b> at room temperature. ....                                                                                                                                                             | S13        |
| <b>Fig. S10.</b> HRMS-ESI $^+$ isotopic pattern positive scan for <b>11</b> . Inset: calculated isotopic pattern for $[\text{C}_{39}\text{H}_{33}\text{B}_2\text{N}_5\text{O}_6\text{Br}]^+$ .....                                                  | S13        |
| <b>Characterization of 6,6'-((pyridine-2,6-dicarbonyl)bis(azanediyl))bis(1-benzylquinolin-1-ium) dibromide, 12.</b> .....                                                                                                                           | <b>S14</b> |
| <b>Fig. S11.</b> $^1\text{H}$ NMR spectrum (700 MHz) of <b>12</b> in DMSO- $d_6$ at 298 K. ....                                                                                                                                                     | S15        |
| <b>Fig. S12.</b> 2D-NMR HSQC $^1\text{H}$ - $^{13}\text{C}\{^1\text{H}\}$ (700 MHz - 175 MHz) spectrum of <b>12</b> in DMSO- $d_6$ at 298 K. ...                                                                                                    | S15        |
| <b>Fig. S13.</b> Infrared spectrum (ATR) of compound <b>12</b> . ....                                                                                                                                                                               | S16        |
| <b>Characterization of 6-benzamido-1-(3-boronobenzyl)quinolin-1-ium bromide, 13.</b> .....                                                                                                                                                          | <b>S17</b> |
| <b>Fig. S14.</b> $^1\text{H}$ NMR spectrum of compound <b>13</b> in acetonitrile- $d_3$ /D $_2$ O (1:3) at 298 K. ....                                                                                                                              | S18        |
| <b>Fig. S15.</b> $^{13}\text{C}\{^1\text{H}\}$ NMR spectrum of compound <b>13</b> in acetonitrile- $d_3$ /D $_2$ O (1:3) at 298 K. ....                                                                                                             | S18        |
| <b>Fig. S16.</b> $^{11}\text{B}$ NMR spectrum (96.3 MHz) of compound <b>13</b> in Methanol- $d_4$ at 297 K. Smoothing by average movement method, factor 5. *Esterified specie. ....                                                                | S19        |
| <b>Fig. S17.</b> Infrared spectrum (ATR) of compound <b>13</b> . ....                                                                                                                                                                               | S19        |
| <b>Fig. S18.</b> ORTEP diagram of the unit cell view along the axes of <b>11-SO<math>_4</math></b> . Space group: <i>P</i> -1, volume = 2503.8(3) Å $^3$ ; Z = 2. Some molecules of DMSO were omitted for clarity .....                             | S20        |
| <b>Fig. S19.</b> Crystal packing perspectives of the $\pi$ - $\pi$ stacking interactions for <b>11-SO<math>_4</math></b> . Centroid-centroid distances are shown as dotted lines. Solvent molecules and sulfate anion are omitted for clarity. .... | S20        |
| <b>Fig. S20.</b> UV-vis pH titration of a water solution of <b>11</b> [20 $\mu\text{M}$ ] buffered with MOPS, MES and CAPS [10 mM] in presence of D-fructose [10 mM]. ....                                                                          | S21        |

## GENERAL CONDITIONS

Reagents and solvents were purchased as reagent grades and used without further purification. Compounds **9** and **10** were synthesized based on previously reported procedures.<sup>1</sup> On the other hand, **11-13** were obtained with methodologies described in the literature with slight modification (*vide infra*).<sup>2,3</sup> NMR spectra were recorded on a Bruker 300 with solvent peaks as the internal reference. <sup>1</sup>H and <sup>13</sup>C NMR spectra were obtained for solutions in (CD<sub>3</sub>)<sub>2</sub>SO, D<sub>2</sub>O and/or CD<sub>3</sub>CN; <sup>11</sup>B spectra were acquired for solutions in CD<sub>3</sub>OD or mixtures as specified in the footnotes. The assignments were confirmed by two-dimensional NMR experiments (COSY <sup>1</sup>H-<sup>1</sup>H, HSQC <sup>1</sup>H-<sup>13</sup>C, and HMBC <sup>1</sup>H-<sup>13</sup>C). High-Resolution Electrospray Ionization mass with positive scan spectra for bromide salts of **11-13** and **11** and in the presence of sorbitol were obtained with a Bruker Micro TOF II.

Combustion analysis were recorded by a vario MICRO cube Elemental Analyzer Analysensysteme GmbH in CHNS modus.

Fluorescence Lifetime. A time-correlated single photon counting system coupled to a custom-built confocal microscope was used to acquire the fluorescence lifetimes. A 354 nm picosecond laser pulsed at 10 MHz (LDH-DC-405, PicoQuant) was focused into a 1 cm quartz cell with a 0.85 NA microscope objective. The fluorescence collected with the same objective was passed through a 366 nm long-pass dichroic mirror (Chroma T510lpxrxt), a 364 nm notch filter (Chroma ZET405nf), and a 425 nm long pass emission filter (Chroma ET425lp) and was focused to an avalanche photodiode (PD-050-CTE, MPD). The laser controller (PDL-800-D, PicoQuant) and the APD were connected to a TCSPC card (PicoHarp 300, PicoQuant). The power of irradiation was controlled to obtain less than 1% of the detection events in order to avoid pile-up effects on the recorded histogram. Allura Red (analytical standard) was used to obtain the IRF under the same conditions of irradiation. All data were obtained and treated in SymphoTime software (PicoQuant).

*Synthesis of N<sup>2</sup>,N<sup>6</sup>-di(quinolin-6-yl)pyridin-2,6-dicarboxamide, 9*

The nucleophilic addition of *6-aminoquinoline* (500.0 mg, 3.47 mmol) into *2,6-pyridinedicarbonyl dichloride* was achieved in dry toluene (40 mL) under reflux for 4 hours in N<sub>2</sub> atmosphere. The bright-yellow precipitate was collected by vacuum filtration and washed twice with acetone. Then, the compound was neutralized with 3% NaHCO<sub>3</sub> aqueous solution to give a pale-yellow powder that corresponds to the desired compound after drying. The compound **9** was obtained at high purity according to <sup>1</sup>H and <sup>13</sup>C NMR spectra in 96% yield.

*Synthesis of N-(quinolin-6-yl)benzamide, 10.*

*6-aminoquinoline* (500.0 mg, 3.47 mmol) and *benzoyl chloride* (3.47 mmol) were combined in dry toluene (40ml) and stirred at reflux for 2 hours. The yellow precipitate was isolated by filtration and then slurred in acetone for 2 hours and filtered again in a vacuum, and washed with extra cold acetone (30 mL). The solid was suspended in deionized water (10 mL), and a 3% NaHCO<sub>3</sub> aqueous solution was added to neutralize it. A pale-yellow powder was obtained and isolated by vacuum filtration and washed with two portions of 100 mL of distilled water. The solid was dried up in the air and then under vacuum (95% yield). The compound was identified by <sup>1</sup>H and <sup>13</sup>C NMR spectroscopy.

*Synthesis 6,6'-((pyridine-2,6-dicarbonyl)bis(azanediyl))bis(1-benzylquinolin-1-ium) dibromide, 12.*

The compound **9** (100.0 mg, 0.238 mmol) was dissolved in 5 mL of anhydrous dimethylformamide (DMF). Then, a slight excess of bromomethyl-benzene (122.3 mg, 0.715 mmol) was added and stirred for 24 hours at room temperature under an N<sub>2</sub> atmosphere. The volume of solvent was halved under vacuum at 50 °C on a rotary evaporator; thus, a yellow precipitate was obtained. The yellow solid was isolated by vacuum filtration and washed twice with 10 mL of ethyl acetate/acetone mixture (1:3) and finally with 10 mL of diethyl ether. The yellow solid was dried under reduced pressure to give the bromide salt **11** in 87% yield (158.0 mg). The compound was identified by <sup>1</sup>H and <sup>13</sup>C NMR spectroscopy techniques.

*Crystal structure of 11-SO<sub>4</sub>*

**Table S1.** Crystal data and structure refinement for **11-SO<sub>4</sub>**

|                                                   |                                                                                                    |
|---------------------------------------------------|----------------------------------------------------------------------------------------------------|
| <b>Empirical formula</b>                          | C <sub>45</sub> H <sub>57.41</sub> N <sub>5</sub> O <sub>16.21</sub> S <sub>4</sub> B <sub>2</sub> |
| <b>Formula weight</b>                             | 1077.52                                                                                            |
| <b>Temperature/K</b>                              | 273(2)                                                                                             |
| <b>Crystal system</b>                             | Triclinic                                                                                          |
| <b>Space group</b>                                | P-1                                                                                                |
| <b>a/Å</b>                                        | 11.5675(8)                                                                                         |
| <b>b/Å</b>                                        | 14.3355(10)                                                                                        |
| <b>c/Å</b>                                        | 15.8991(11)                                                                                        |
| <b>α/°</b>                                        | 95.8776(14)                                                                                        |
| <b>β/°</b>                                        | 100.6117(14)                                                                                       |
| <b>γ/°</b>                                        | 102.3371(14)                                                                                       |
| <b>Volume/Å<sup>3</sup></b>                       | 2503.8(3)                                                                                          |
| <b>Z</b>                                          | 2                                                                                                  |
| <b>ρ<sub>calc</sub>/cm<sup>3</sup></b>            | 1.429                                                                                              |
| <b>μ/mm<sup>-1</sup></b>                          | 0.265                                                                                              |
| <b>F(000)</b>                                     | 1132.0                                                                                             |
| <b>Crystal size/mm<sup>3</sup></b>                | 0.303 × 0.267 × 0.261                                                                              |
| <b>Radiation</b>                                  | MoKα (λ = 0.71073)                                                                                 |
| <b>2θ range for data collection/°</b>             | 3.648 to 54.89                                                                                     |
| <b>Index ranges</b>                               | -15 ≤ h ≤ 15, -18 ≤ k ≤ 18, -20 ≤ l ≤ 20                                                           |
| <b>Reflections collected</b>                      | 107739                                                                                             |
| <b>Independent reflections</b>                    | 11433 [R <sub>int</sub> = 0.0417, R <sub>sigma</sub> = 0.0196]                                     |
| <b>Data/restraints/parameters</b>                 | 11433/146/745                                                                                      |
| <b>Goodness-of-fit on F<sup>2</sup></b>           | 1.029                                                                                              |
| <b>Final R indexes [I ≥ 2σ(I)]</b>                | R <sub>1</sub> = 0.0396, wR <sub>2</sub> = 0.1044                                                  |
| <b>Final R indexes [all data]</b>                 | R <sub>1</sub> = 0.0467, wR <sub>2</sub> = 0.1105                                                  |
| <b>Largest diff. peak/hole / e Å<sup>-3</sup></b> | 0.71/-0.65                                                                                         |

Table S2. Hydrogen Bonds for *II-SO<sub>4</sub>*

| D   | H    | A    | d(D-H)/Å  | d(H-A)/Å  | d(D-A)/Å   | D-H-A/°   |
|-----|------|------|-----------|-----------|------------|-----------|
| O2  | H2A  | S1   | 0.841(10) | 2.919(13) | 3.7131(13) | 158(2)    |
| O2  | H2A  | O7   | 0.841(10) | 1.942(11) | 2.7662(18) | 166(2)    |
| O3  | H3A  | S1   | 0.843(10) | 2.829(14) | 3.5981(14) | 153(2)    |
| O3  | H3A  | O10  | 0.843(10) | 1.862(10) | 2.7045(18) | 179(3)    |
| O5  | H5   | S1   | 0.840(10) | 2.851(14) | 3.6447(14) | 158(2)    |
| O5  | H5   | O10  | 0.840(10) | 1.877(11) | 2.7064(18) | 169(3)    |
| O6  | H6   | S1   | 0.837(10) | 2.856(14) | 3.6274(13) | 154(2)    |
| O6  | H6   | O8   | 0.837(10) | 1.842(11) | 2.6712(17) | 170(2)    |
| N2  | H2N  | N1   | 0.846(9)  | 2.25(2)   | 2.6751(18) | 111.2(16) |
| N2  | H2N  | O11  | 0.846(9)  | 2.268(15) | 2.9924(17) | 143.7(19) |
| N4  | H4N  | O11  | 0.852(9)  | 2.171(12) | 2.9794(17) | 158.4(19) |
| O11 | H11A | O9   | 0.827(10) | 1.965(11) | 2.7739(17) | 166(2)    |
| O11 | H11B | O12  | 0.829(9)  | 2.017(10) | 2.8400(18) | 172(2)    |
| O12 | H12A | S2   | 0.848(10) | 2.911(12) | 3.7343(16) | 164(2)    |
| O12 | H12A | O15  | 0.848(10) | 1.916(12) | 2.746(2)   | 166(3)    |
| O12 | H12A | S2A  | 0.848(10) | 2.778(18) | 3.567(11)  | 156(3)    |
| O12 | H12A | O15A | 0.848(10) | 2.17(3)   | 2.97(3)    | 157(3)    |
| O12 | H12B | S3   | 0.846(10) | 3.011(14) | 3.8027(15) | 157(2)    |
| O12 | H12B | O16  | 0.846(10) | 1.951(11) | 2.793(2)   | 173(3)    |
| O13 | H13A | O12  | 0.843(10) | 1.937(12) | 2.771(2)   | 170(4)    |
| O13 | H13B | S4   | 0.841(10) | 2.71(3)   | 3.310(2)   | 129(3)    |
| O13 | H13B | O17  | 0.841(10) | 2.135(16) | 2.941(2)   | 160(4)    |
| O14 | H14A | O7   | 0.840(10) | 2.080(18) | 2.901(3)   | 165(6)    |
| O14 | H14B | O7   | 0.840(10) | 2.17(3)   | 2.925(3)   | 150(5)    |
| O14 | H14B | O14  | 0.840(10) | 2.32(5)   | 2.847(6)   | 121(5)    |

Symmetry transformations used to generate equivalent atoms:

#1 x,y-1,z #2 -x+1,-y+1,-z

Table S3. Bond Lengths for boronic acid moieties in *II-SO<sub>4</sub>*

| Atom | Atom | Length/Å | Atom | Atom | Length/Å |
|------|------|----------|------|------|----------|
| O5   | B1   | 1.353(2) | O2   | B2   | 1.357(2) |
| O6   | B1   | 1.356(2) | O3   | B2   | 1.360(2) |
| C36  | B1   | 1.578(3) | C19  | B2   | 1.577(3) |

**Table S4.** Bond Angles for boronic acid moieties in **11-SO<sub>4</sub>**

| Atom | Atom | Atom | Angle/ <sup>o</sup> | Atom | Atom | Atom | Angle/ <sup>o</sup> |
|------|------|------|---------------------|------|------|------|---------------------|
| O5   | B1   | O6   | 125.02(17)          | O2   | B2   | O3   | 124.51(17)          |
| O5   | B1   | C36  | 117.38(16)          | O2   | B2   | C19  | 117.97(15)          |
| O6   | B1   | C36  | 117.59(15)          | O3   | B2   | C19  | 117.51(16)          |

**Table S5.**  $\pi - \pi$  interactions measured for **11-SO<sub>4</sub>**

| Atoms of 1st plane        | Atoms of 2nd plane        | Angle/ <sup>o</sup> | Centroid-centroid distance/Å | Shift distance/Å |
|---------------------------|---------------------------|---------------------|------------------------------|------------------|
| [C7-C8-C9-C10-C14-C15]    | [N3-C11-C12-C13-C14-C10]  | 3.907               | 3.523                        | 0.930            |
| [C24-C27-C28-C32-C33-C25] | [C24-C27-C28-C32-C33-C25] | 0.000               | 3.800                        | 1.721            |
| [C24-C27-C28-C32-C33-C25] | [N1-C5-C4-C3-C2-C1]       | 5.542               | 3.635                        | 1.270            |
| [C24-C27-C28-C32-C33-C25] | [N5-C32-C28-C29-C31-C30]  | 0.590               | 3.496                        | 0.883            |
| [C17-C18-C19-C20-C21-C22] | [C17-C18-C19-C20-C21-C22] | 0.000               | 3.755                        | 1.276            |

$^1\text{H}$  and  $^{13}\text{C}$  NMR spectra of  $N^2, N^6$ -di(quinolin-6-yl)pyridin-2,6-dicarboxamide, **9**.

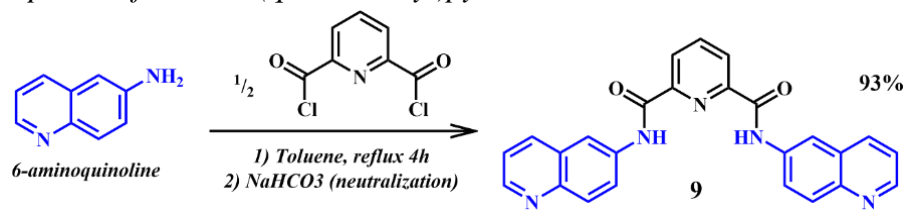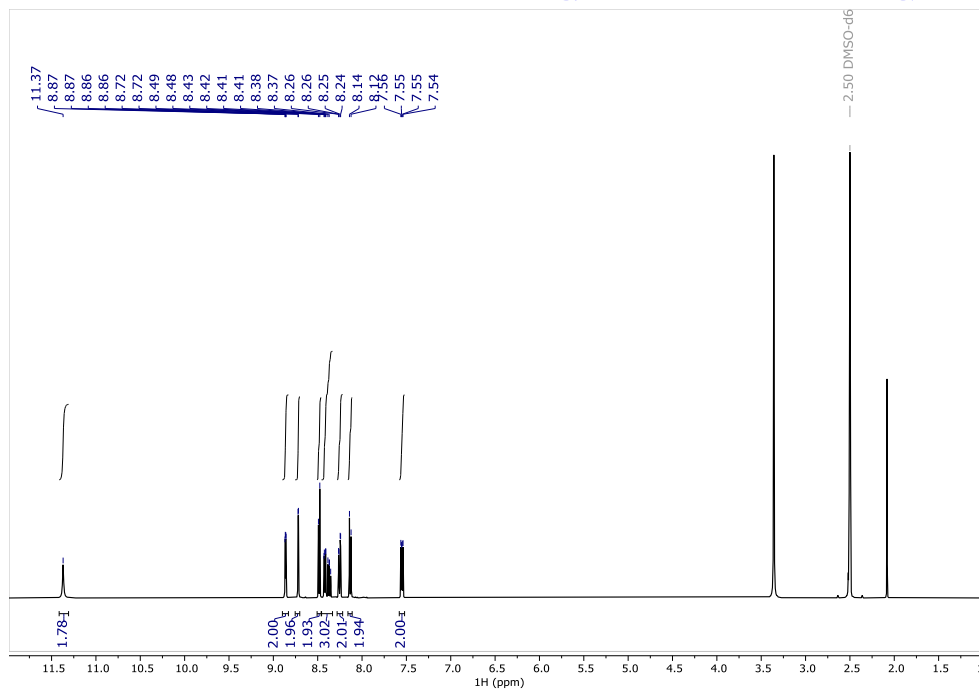

Fig. S1.  $^1\text{H}$  NMR spectrum of compound **9** (500 MHz,  $\text{DMSO-d}_6$ , 300 K)

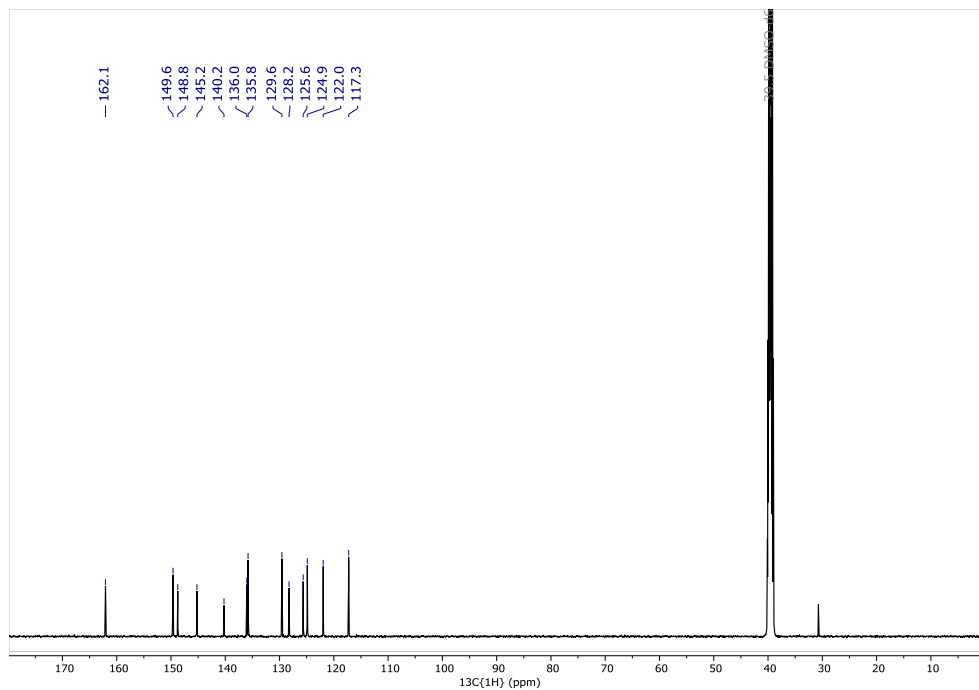

Fig. S2.  $^{13}\text{C}\{^1\text{H}\}$  NMR spectrum of compound **9** (125.7 MHz,  $\text{DMSO-d}_6$ , 297 K)



$^1\text{H}$  and  $^{13}\text{C}$  NMR spectra of *N*-(quinolin-6-yl)benzamide, **10**.

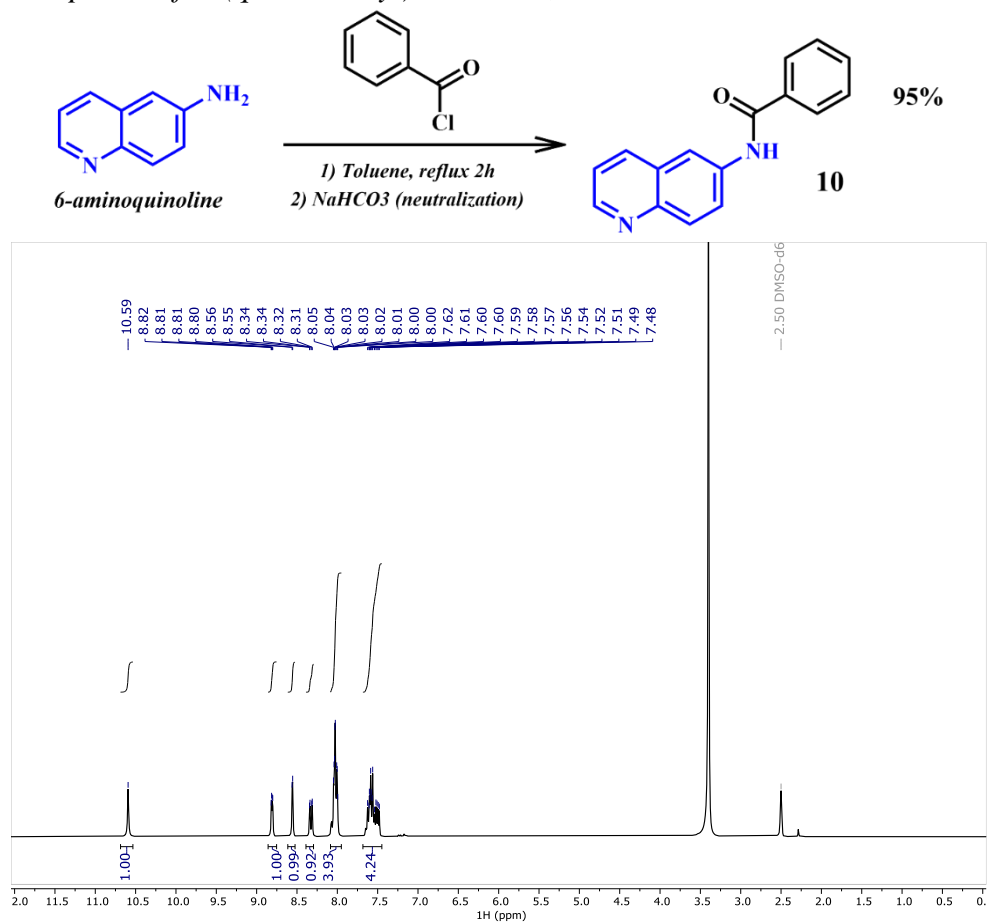

Fig. S3.  $^1\text{H}$  NMR spectrum of compound **10** (300 MHz, DMSO-*d*<sub>6</sub>, 297 K)

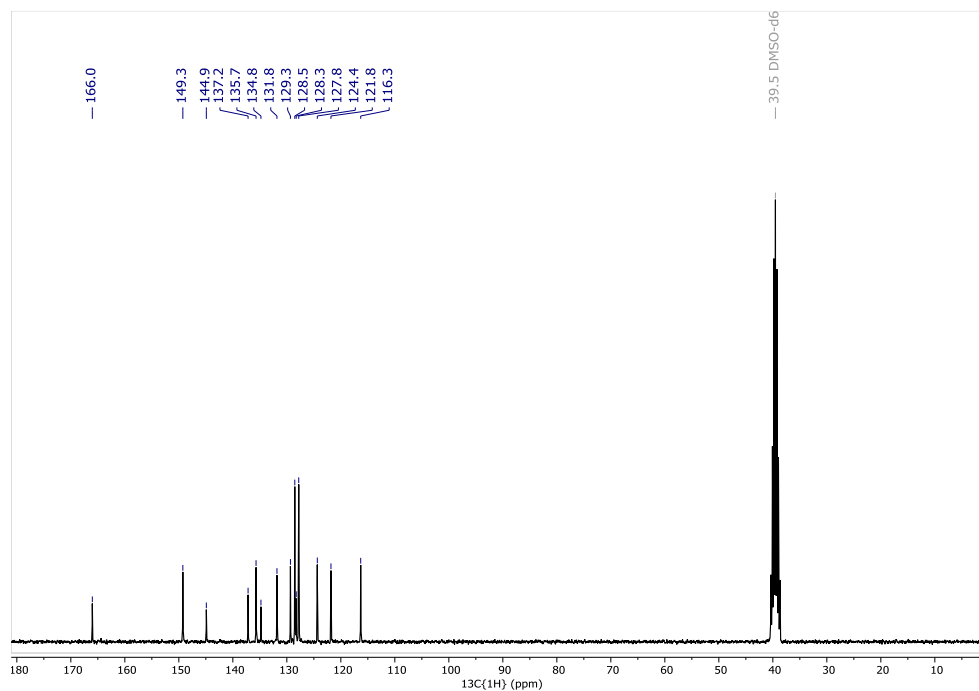

Fig. S4.  $^{13}\text{C}\{^1\text{H}\}$  NMR spectrum of compound **10** (75.45 MHz, DMSO-*d*<sub>6</sub>, 297 K)

Characterization of 3,3'-((pyridine-2,6-dicarbonyl)bis(azanediyl))bis(1-(3-boronobenzyl)quinolin-1-ium) dibromide, **11**.

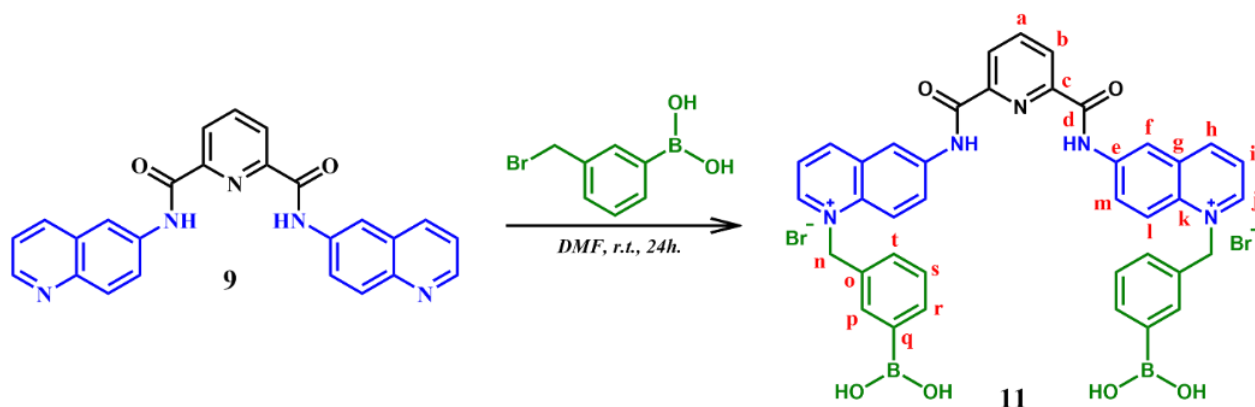

**<sup>1</sup>H NMR** (300 MHz, 298 K, DMSO-*d*<sub>6</sub>); δ 11.61 (s, 2H, *NH*<sub>(amide)</sub>), 9.62 (d, <sup>3</sup>*J*<sub>HH</sub> = 5.7 Hz, 2H, *H*<sub>*j*</sub>), 9.22 (<sup>3</sup>*J*<sub>HH</sub> = 8.7 Hz, 2H, *H*<sub>*h*</sub>), 8.61-8.50 (m, 6H, *H*<sub>*i, m, l*</sub>), 8.41 (m, 1H, *H*<sub>*a*</sub>), 8.30 (*pseudo-t*, <sup>3</sup>*J*<sub>HH</sub> = 6.9 Hz, 2H, *H*<sub>*b*</sub>), 8.19 (*broad-s*, 4H, *BOH*), 7.78 (d, <sup>3</sup>*J*<sub>HH</sub> = 7.2 Hz, 2H, *H*<sub>*r*</sub>), 7.68 (s, 2H, *H*<sub>*p*</sub>), 7.48 (d, <sup>3</sup>*J*<sub>HH</sub> = 7.5 Hz, 2H, *H*<sub>*t*</sub>), 7.40 (t, <sup>3</sup>*J*<sub>HH</sub> = 7.5 Hz, 2H, *H*<sub>*s*</sub>), 6.37 (s, 4H, *CH*<sub>2</sub>). **<sup>13</sup>C{<sup>1</sup>H} NMR** (100 MHz, 298 K, DMSO-*d*<sub>6</sub>); δ 163.1 (*carbonyl-C*<sub>*d*</sub>), 149.2 (*C*<sub>*j*</sub>), 148.5 (*C*<sub>*c*</sub>), 148.0 (*C*<sub>*h*</sub>), 142.0 (*C*<sub>*a*</sub>), 139.4 (*C*<sub>*e*</sub>), 135.6 (*C*<sub>*q*</sub>), 135.3 (*C*<sub>*k*</sub>), 135.0 (*C*<sub>*r*</sub>), 133.5 (*C*<sub>*o*</sub>), 132.9 (*C*<sub>*p*</sub>), 131.7 (*C*<sub>*g*</sub>), 130.6 (*C*<sub>*i*</sub>), 129.6 (*C*<sub>*l*</sub>), 128.9 (*C*<sub>*s*</sub>), 126.6 (*C*<sub>*m*</sub>), 123.4 (*C*<sub>*b*</sub>), 120.8 (*C*<sub>*l*</sub>), 118.5 (*C*<sub>*f*</sub>), 60.7 (*methylene-C*<sub>*n*</sub>); **<sup>11</sup>B NMR** (96.3 MHz, 298 K, CD<sub>3</sub>OD) δ 27.4 (*broad signal*); **HRMS-ESI<sup>+</sup>** (*m/z*): calculated for [C<sub>39</sub>H<sub>33</sub>B<sub>2</sub>N<sub>5</sub>O<sub>6</sub>Br]<sup>+</sup>: 768.179484, found: 768.179957. **ATR-IR** ν (cm<sup>-1</sup>): 3218*br*, 1546*s*, 1378*s*, 1333*s*, 771*m* and 714*m*. **UV-absorptions** λ<sub>max</sub> (Buffer MOPS pH 7.4)/nm (log ε): 274 (4.57), 350 (3.87). **Fluorescence emission** λ<sub>max</sub> (Buffer MOPS pH 7.4)/nm: 463.

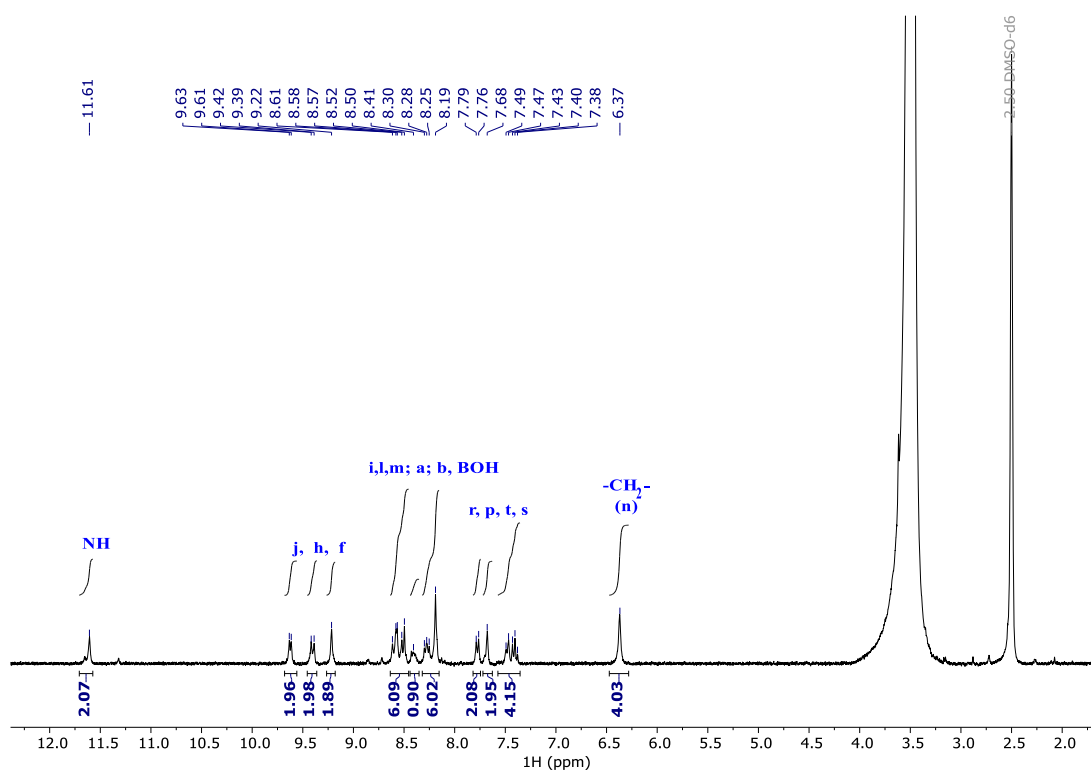

Fig. S5.  $^1\text{H}$  NMR spectrum (300 MHz) of compound **11** in  $\text{DMSO-}d_6$  at 298 K.

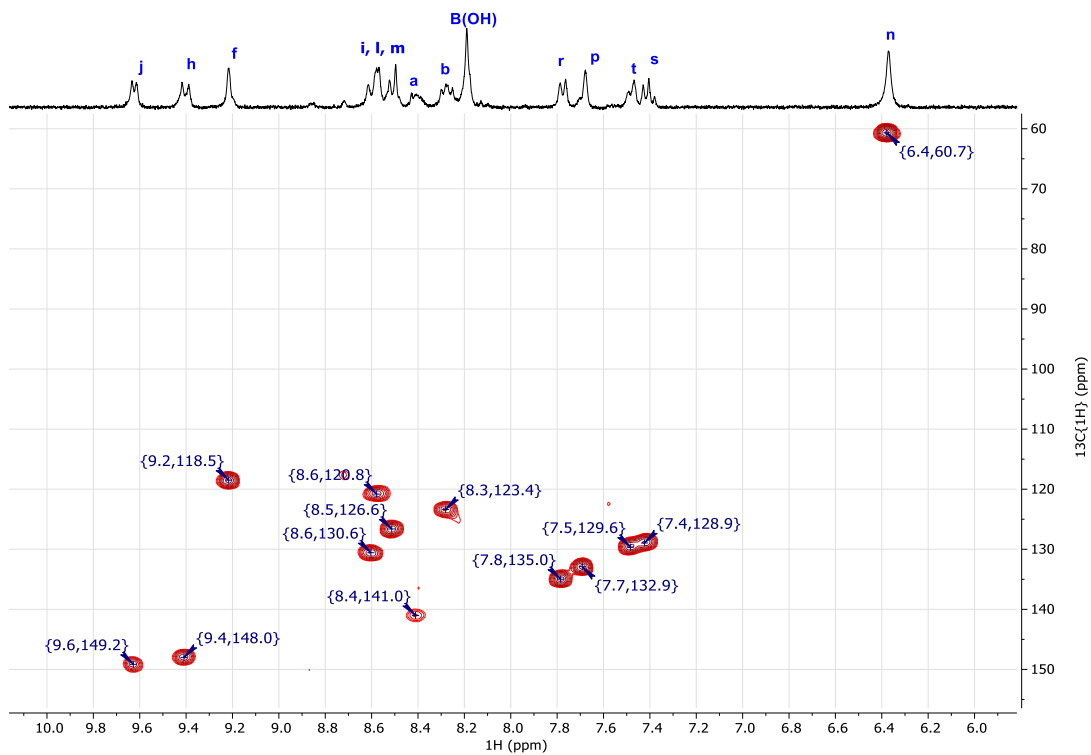

Fig. S6. HSQC  $^1\text{H}$ - $^{13}\text{C}$  2D-NMR spectrum of compound **11** in  $\text{DMSO-}d_6$  at 298 K.

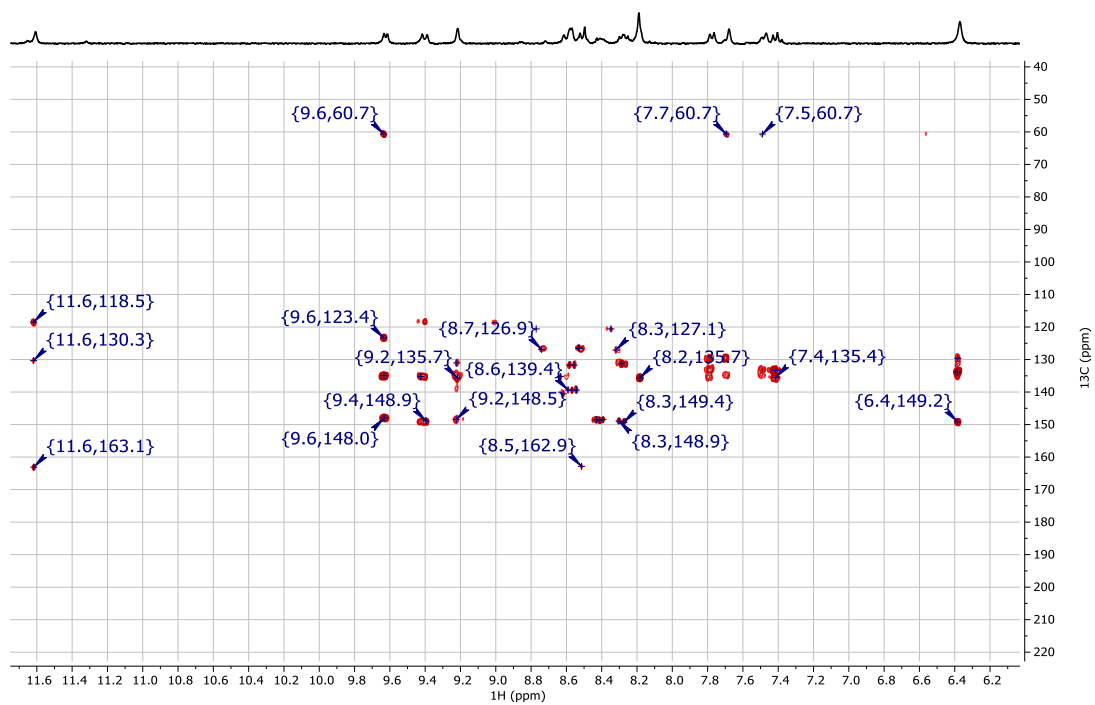

**Fig. S7.** HMBC  $^1\text{H}$ - $^{13}\text{C}$  2D-NMR spectrum of compound **II** in  $\text{DMSO-d}_6$  at 298 K.

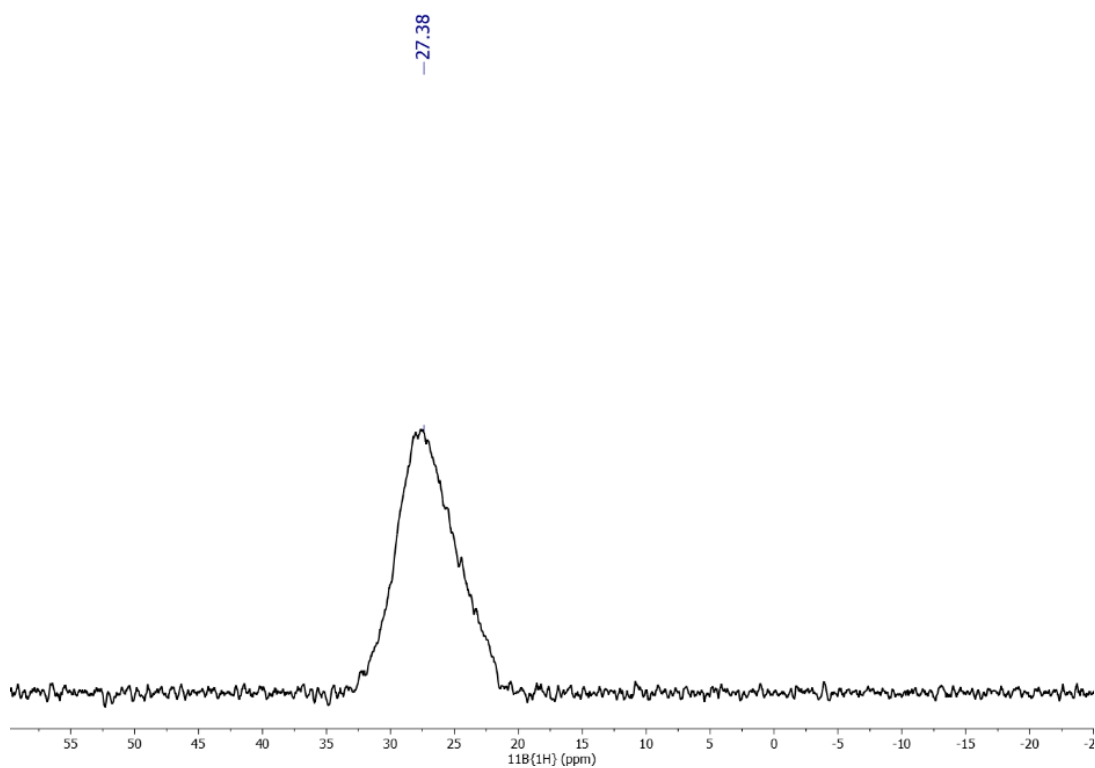

**Fig. S8.**  $^{11}\text{B}$  NMR spectrum (96.3 MHz) of compound **II** in  $\text{Methanol-d}_4$  at 298 K. Smoothing by average movement method, factor 5.

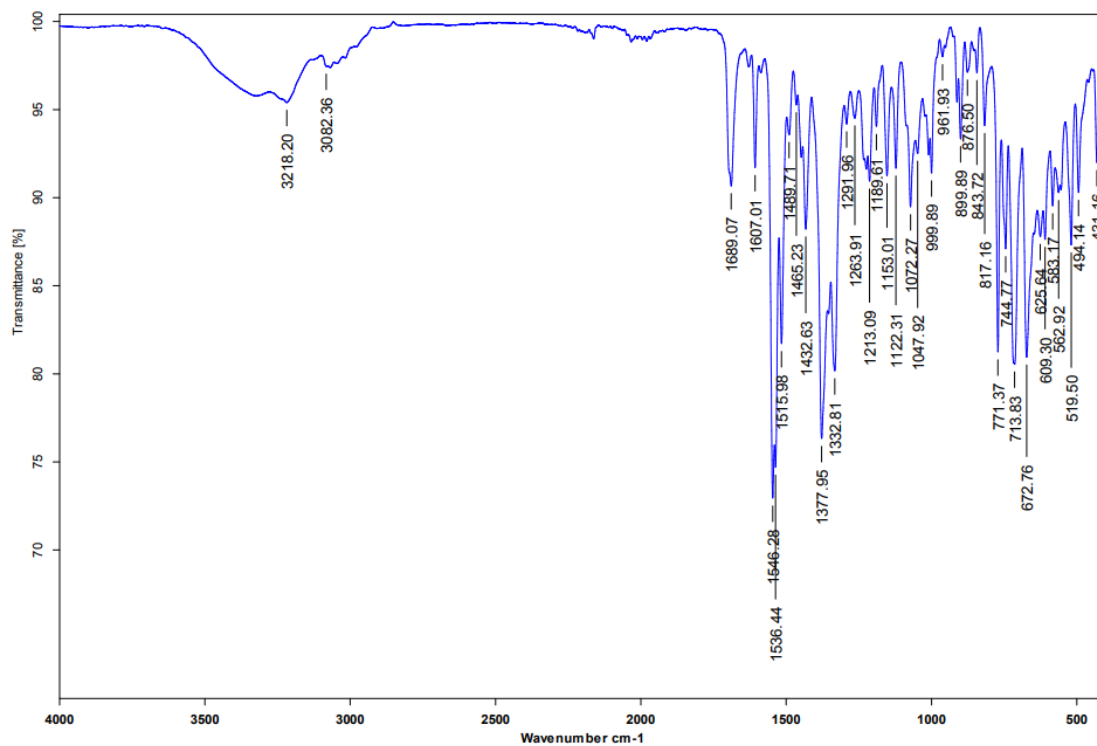

Fig. S9. Infrared spectrum (ATR) of compound **11** at room temperature.

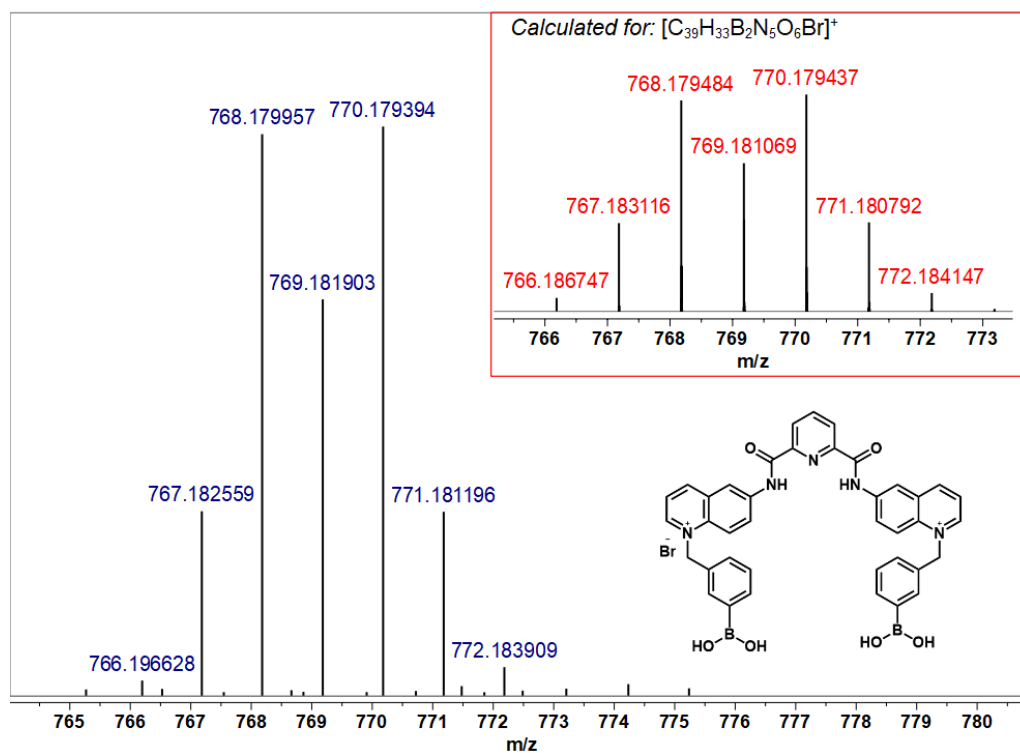

Fig. S10. HRMS-ESI<sup>+</sup> isotopic pattern positive scan for **11**. Inset: calculated isotopic pattern for  $[C_{39}H_{33}B_2N_5O_6Br]^+$

Characterization of 6,6'-((pyridine-2,6-dicarbonyl)bis(azanediy))bis(1-benzylquinolin-1-ium) dibromide, **12**.

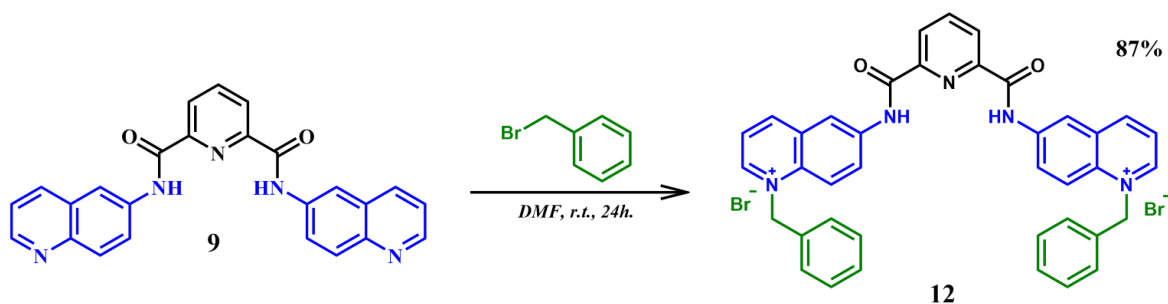

**<sup>1</sup>H NMR** (700 MHz, 298 K, DMSO-*d*<sub>6</sub> (with TMS as internal reference  $\delta$  0.00));  $\delta$  11.59 (s, 2H), 9.65 (dd,  $^3J_{\text{HH}} = 6.3$  Hz,  $^4J_{\text{HH}} = 1.4$  Hz, 2H), 9.43 (dd,  $^3J_{\text{HH}} = 9.1$  Hz,  $^4J_{\text{HH}} = 1.4$  Hz, 2H), 8.62 (m, 3H), 8.52 (d,  $^3J_{\text{HH}} = 7.7$  Hz, 2H), 8.42 (dd,  $^3J_{\text{HH}} = 8.4$  Hz,  $^3J_{\text{HH}} = 7.7$  Hz, 1H), 8.29 (dd,  $^3J_{\text{HH}} = 8.4$  Hz,  $^3J_{\text{HH}} = 5.6$  Hz, 2H), 7.43–7.39 (m, 10H), 6.39 (br. s, 4H); **HSQC <sup>1</sup>H – <sup>13</sup>C NMR** (700 MHz–175 MHz, 298 K, DMSO-*d*<sub>6</sub>) the carbons attached to the hydrogen atoms in **12** were indirectly detected by an HSQC pulse sequence because its low solubility;  $\delta$  149.0, 147.9, 141.0, 130.5, 129.6, 129.2, 127.9, 126.6, 123.3, 120.5, 118.3, 60.4. **HRMS-ESI<sup>+</sup>** (*m/z*): calculated for [C<sub>39</sub>H<sub>31</sub>N<sub>5</sub>O<sub>2</sub>Br]<sup>+</sup> 682.16352, found 682.163278. **ATR-IR**  $\nu$  (cm<sup>-1</sup>): 3406br, 2339br, 3037br, 1545s, 1516s, 1369m, 722m and 648m. **UV-absorptions**  $\lambda_{\text{max}}$  (Buffer MOPS pH 7.4)/nm (log  $\epsilon$ ): 272 (4.76), 355 (4.00). **Fluorescence emission**  $\lambda_{\text{max}}$  (Buffer MOPS pH 7.4)/nm: 464.

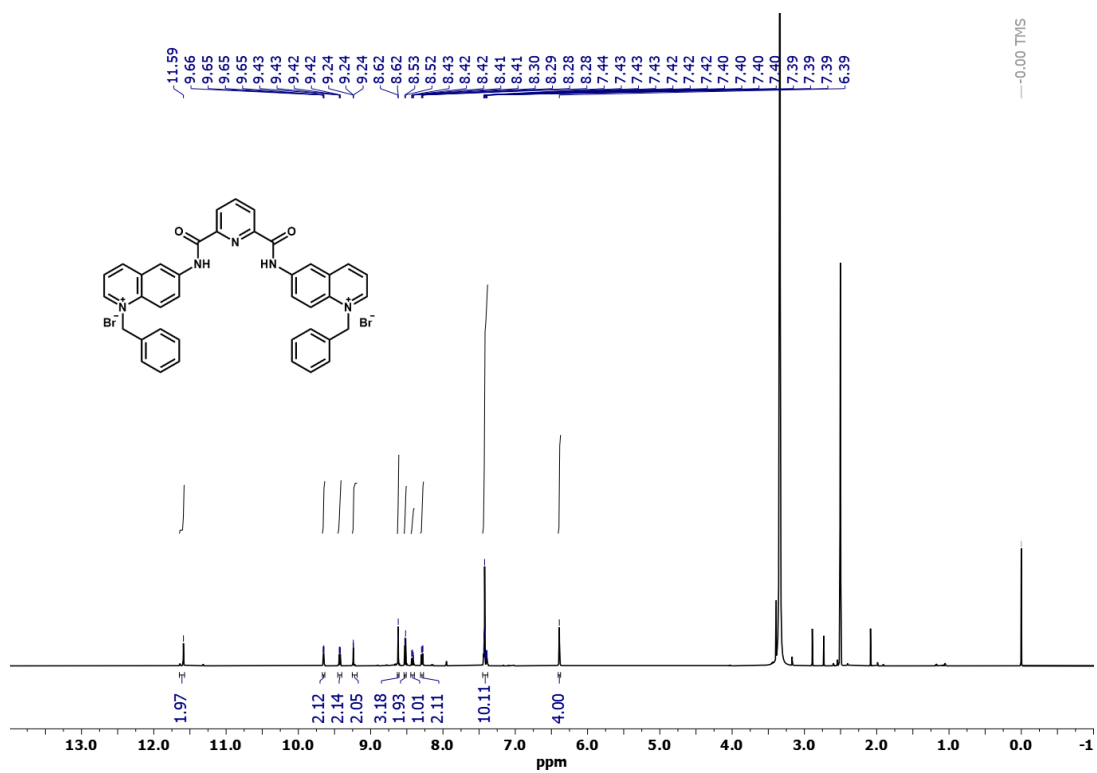

Fig. S11.  $^1\text{H}$  NMR spectrum (700 MHz) of 12 in  $\text{DMSO-d}_6$  at 298 K.

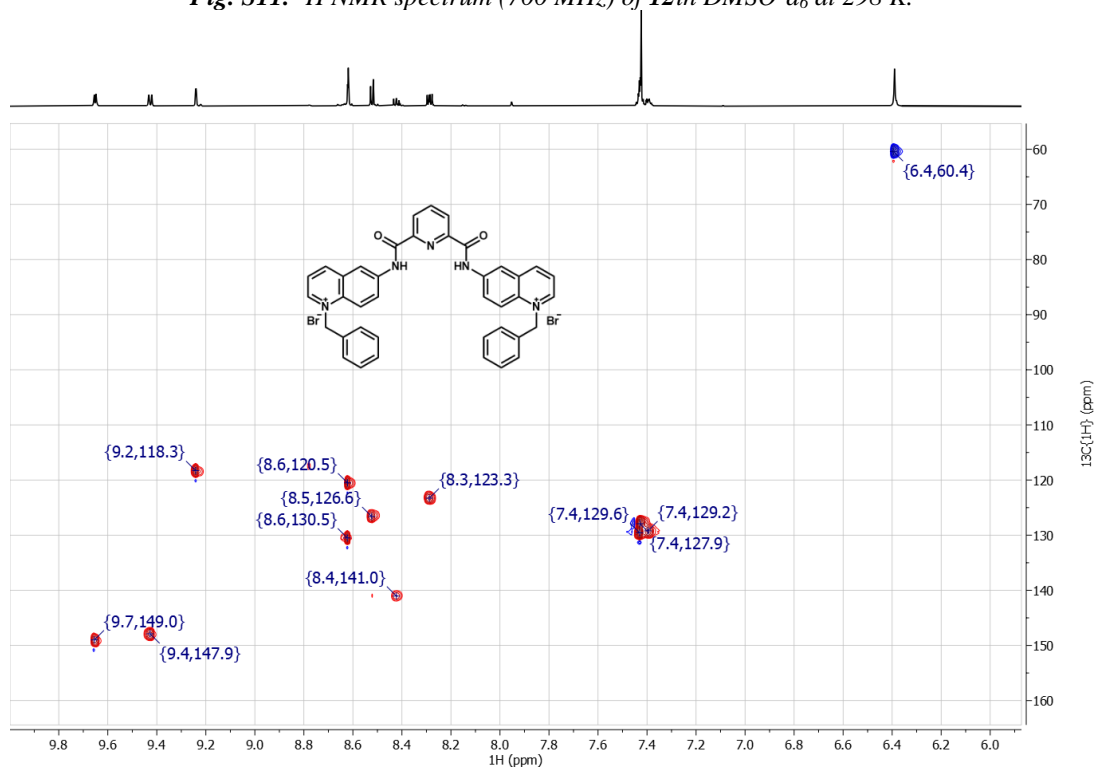

Fig. S12. 2D-NMR HSQC  $^1\text{H} - ^{13}\text{C}\{^1\text{H}\}$  (700 MHz – 175 MHz) spectrum of 12 in  $\text{DMSO-d}_6$  at 298 K.

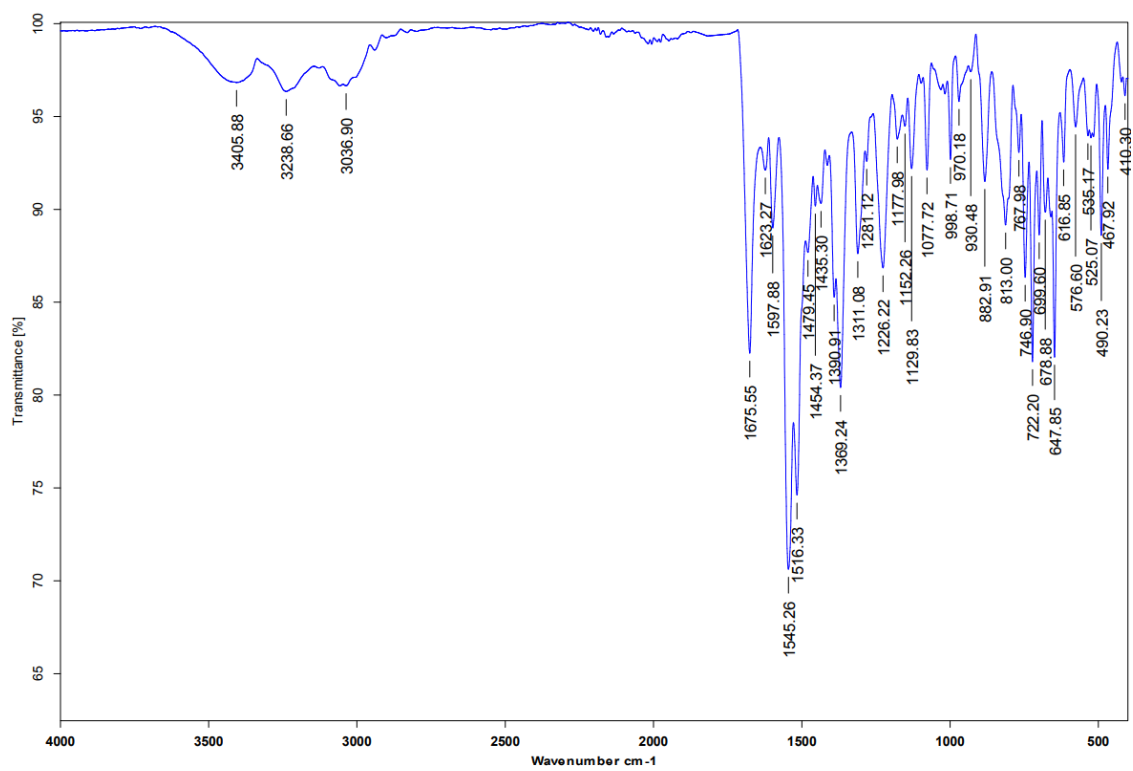

*Fig. S13. Infrared spectrum (ATR) of compound 12.*



Characterization of 6-benzamido-1-(3-boronobenzyl)quinolin-1-ium bromide, **13**.

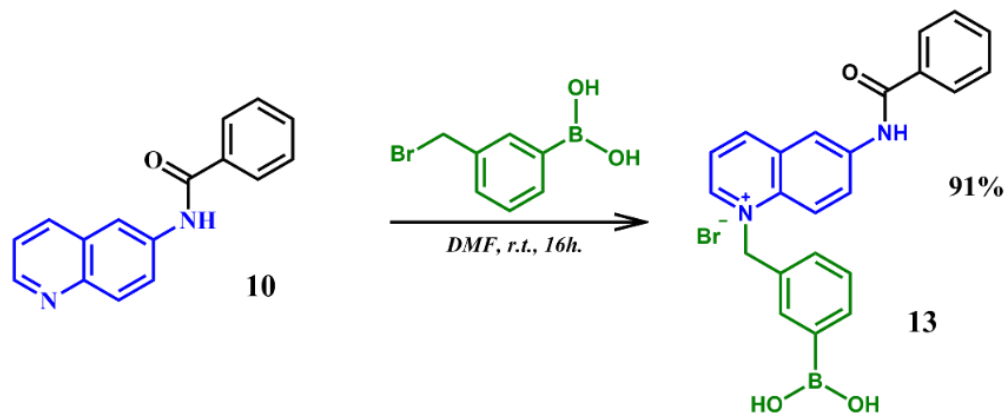

**<sup>1</sup>H NMR** (400 MHz, 298 K, D<sub>2</sub>O/CD<sub>3</sub>CN); δ 9.17 (dd, <sup>3</sup>J<sub>HH</sub> = 6.0 Hz, <sup>4</sup>J<sub>HH</sub> = 1.6 Hz, 1H), 9.97 (d, <sup>3</sup>J<sub>HH</sub> = 8.4 Hz, 1H), 8.59 (d, <sup>3</sup>J<sub>HH</sub> = 2.4 Hz, 1H), 8.23 (d, <sup>3</sup>J<sub>HH</sub> = 9.6 Hz, 1H), 8.15 (dd, <sup>3</sup>J<sub>HH</sub> = 9.6 Hz, <sup>3</sup>J<sub>HH</sub> = 2.4 Hz, 1H), 7.97 (dd, <sup>3</sup>J<sub>HH</sub> = 8.4 Hz, <sup>3</sup>J<sub>HH</sub> = 6.0 Hz, 1H), 7.76 (d, <sup>3</sup>J<sub>HH</sub> = 6.8 Hz, 2H), 7.69 (d, <sup>3</sup>J<sub>HH</sub> = 6.8 Hz, 1H), 7.61 (s, 1H), 7.49 (t, <sup>3</sup>J<sub>HH</sub> = 7.4 Hz, 1H), 7.41 – 7.36 (m, 4H), 6.11 (s, 2H). **<sup>13</sup>C{<sup>1</sup>H} NMR** (100.6 MHz, 298 K, DMSO-d<sub>6</sub>); δ 169.4, 148.8, 148.6, 140.1, 135.8, 135.6, 134.0, 133.7, 133.4, 133.2, 132.1, 130.9, 130.6, 129.9, 129.7, 128.5, 123.4, 120.6, 119.6, 62.0; **<sup>11</sup>B NMR** (160 MHz, 297 K, methanol-d<sub>4</sub>); δ 28.6; **HRMS-ESI<sup>+</sup>** (m/z): calculated for [C<sub>51</sub>H<sub>53</sub>B<sub>2</sub>BrN<sub>5</sub>O<sub>6</sub>]<sup>+</sup> 383.15615, found 383.156633. **ATR-IR** ν (cm<sup>-1</sup>): 3354br, 1667m, 1548s, 1357s, 1330s, 1257s, 705s and 637m. **UV-absorptions** λ<sub>max</sub> (Buffer MOPS pH 7.4)/nm (log ε): 271 (4.80), 325 (4.01), 350 (3.80). **Fluorescence emission** λ<sub>max</sub> (Buffer MOPS pH 7.4)/nm: 473.

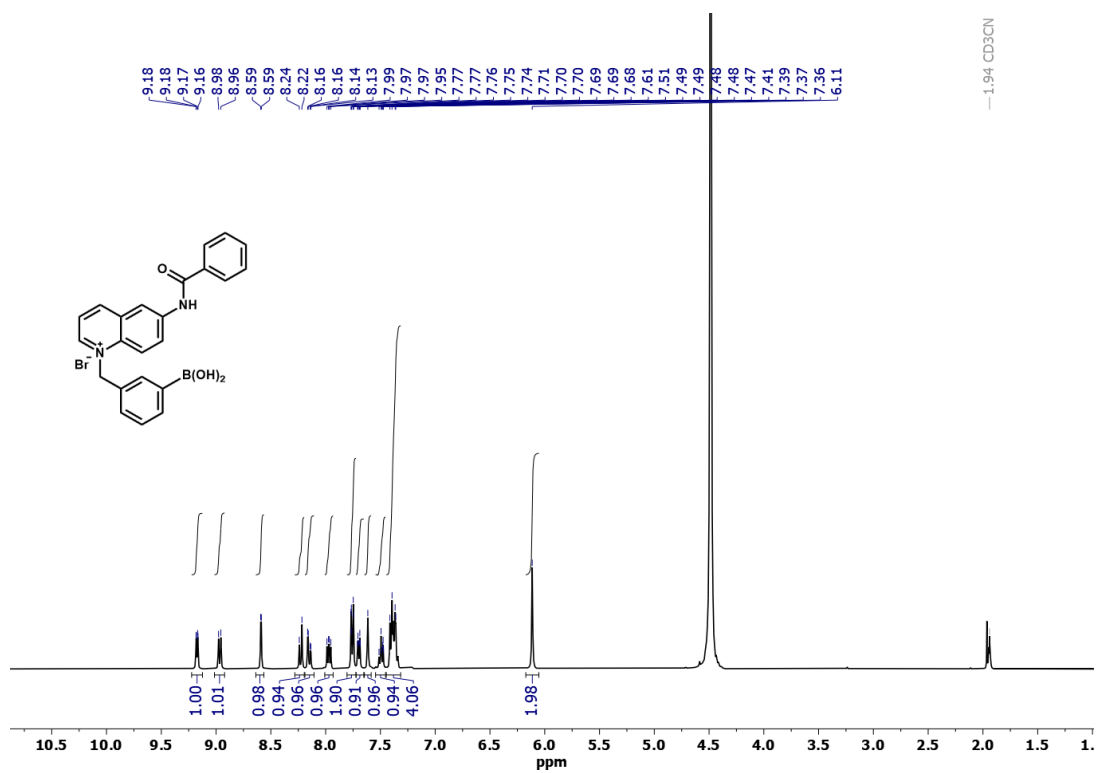

Fig. S14. <sup>1</sup>H NMR spectrum of compound 13 in acetonitrile-d<sub>3</sub>/D<sub>2</sub>O (1:3) at 298 K

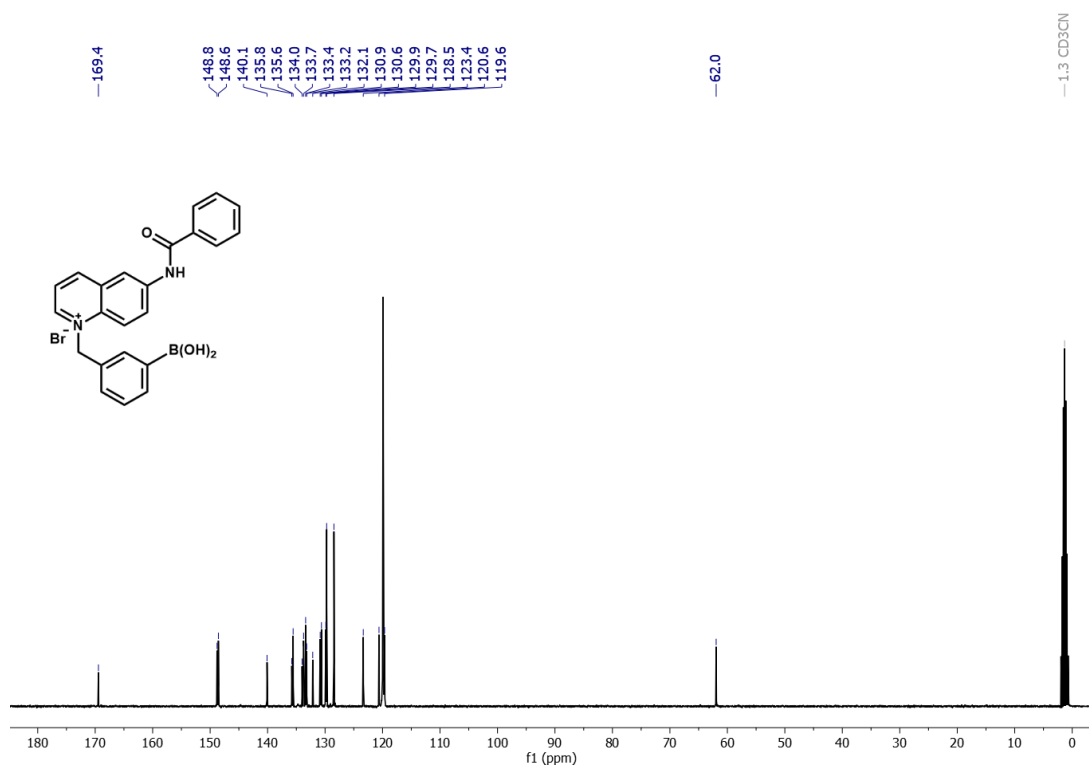

Fig. S15. <sup>13</sup>C{<sup>1</sup>H} NMR spectrum of compound 13 in acetonitrile-d<sub>3</sub>/D<sub>2</sub>O (1:3) at 298 K.

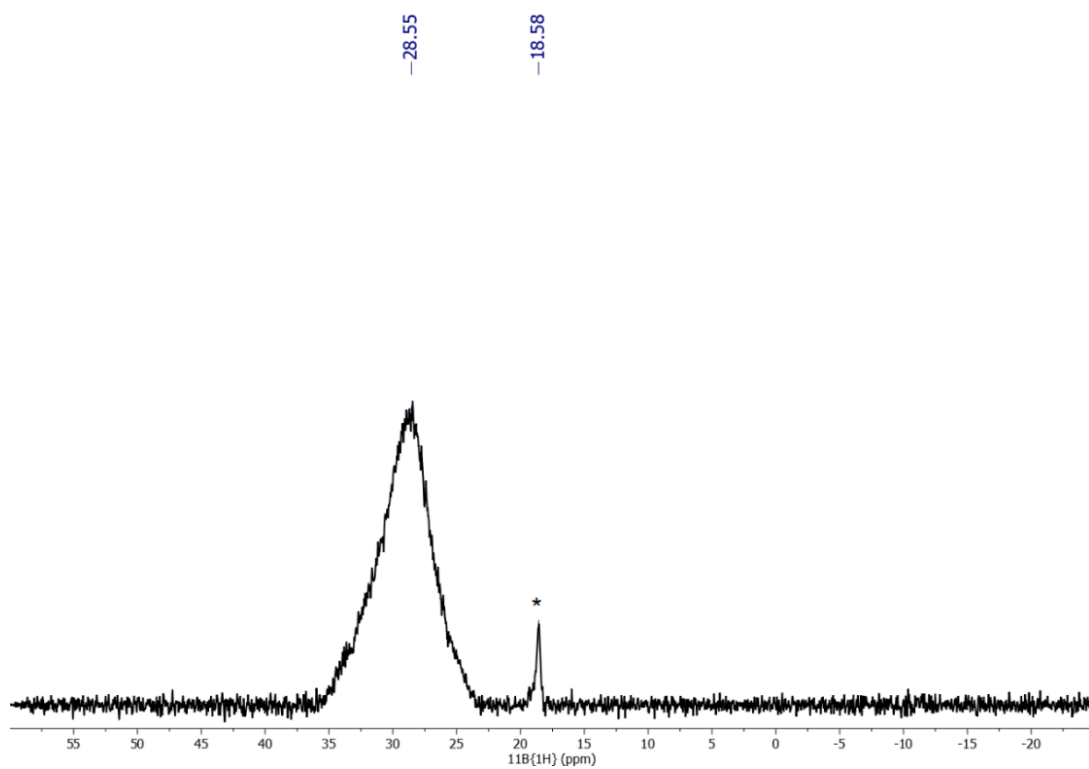

Fig. S16.  $^{11}\text{B}$  NMR spectrum (96.3 MHz) of compound **13** in Methanol- $d_4$  at 297 K. Smoothing by average movement method, factor 5. \*Esterified specie.

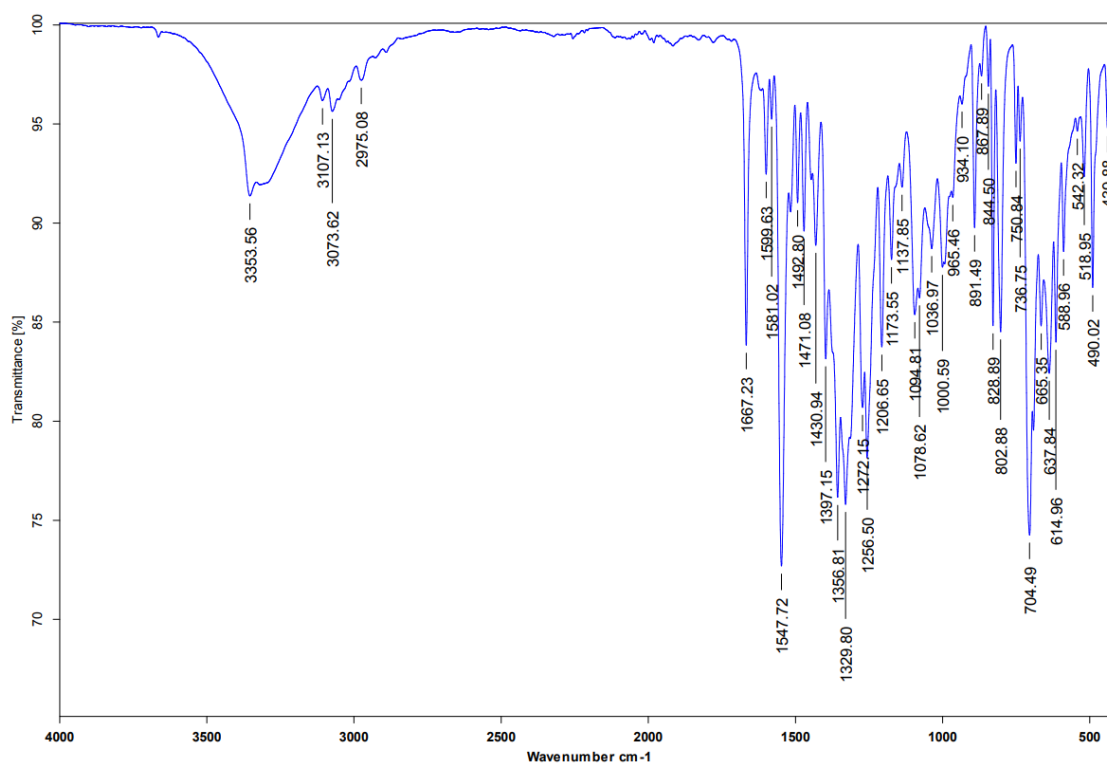

Fig. S17. Infrared spectrum (ATR) of compound **13**.

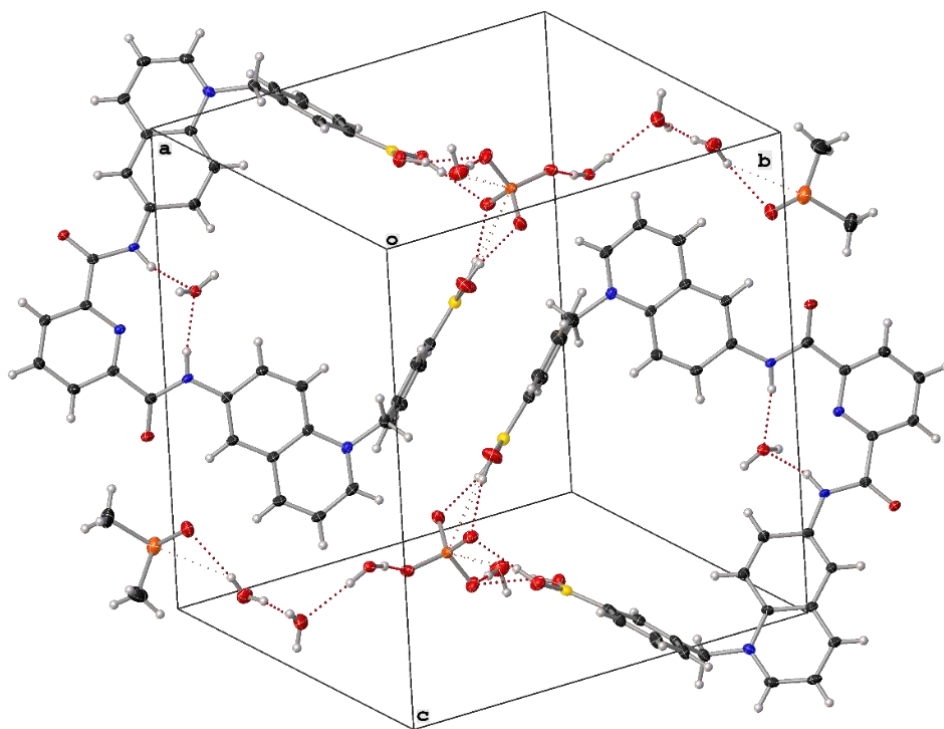

**Fig. S18.** ORTEP diagram of the unit cell view along the axes of **11-SO<sub>4</sub>**. Space group: *P*-1, volume = 2503.8(3) Å<sup>3</sup>; *Z* = 2. Some molecules of DMSO were omitted for clarity

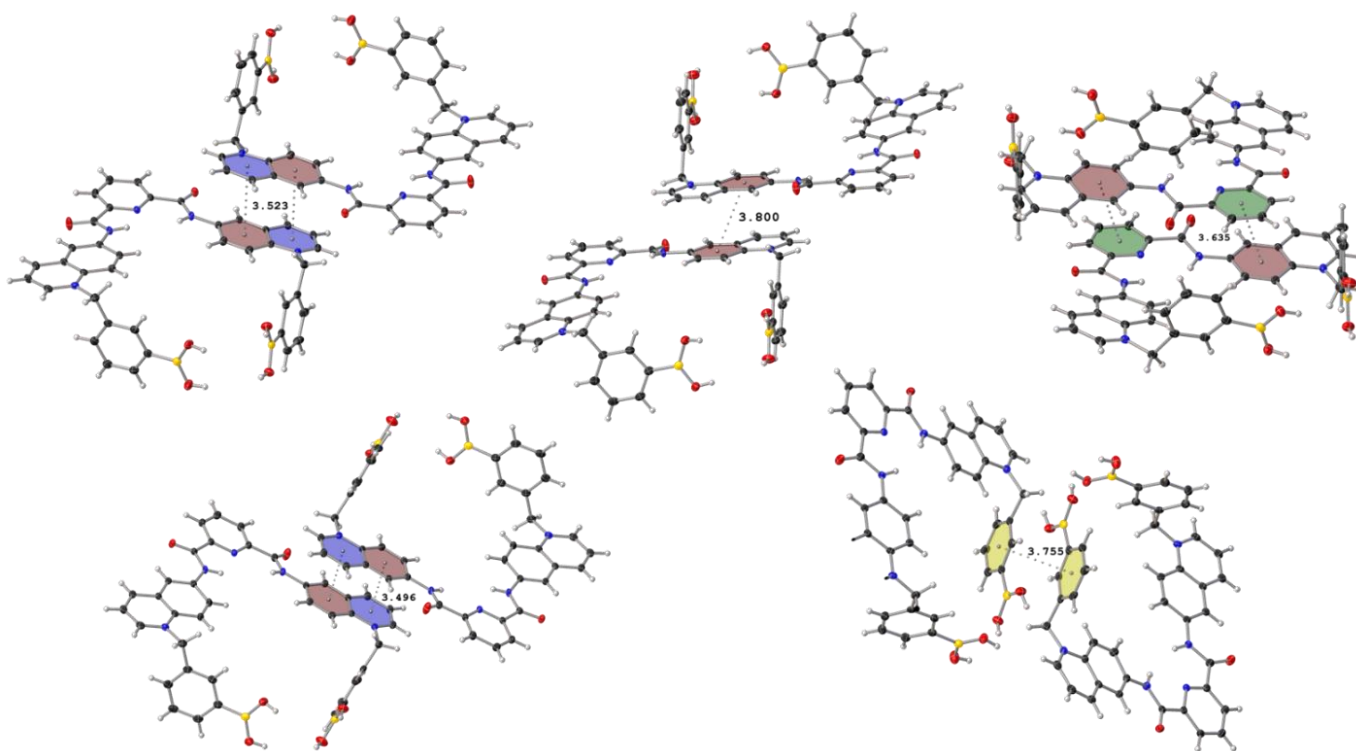

**Fig. S19.** Crystal packing perspectives of the  $\pi$ - $\pi$  stacking interactions for **11-SO<sub>4</sub>**. Centroid-centroid distances are shown as dotted lines. Solvent molecules and sulfate anion are omitted for clarity.

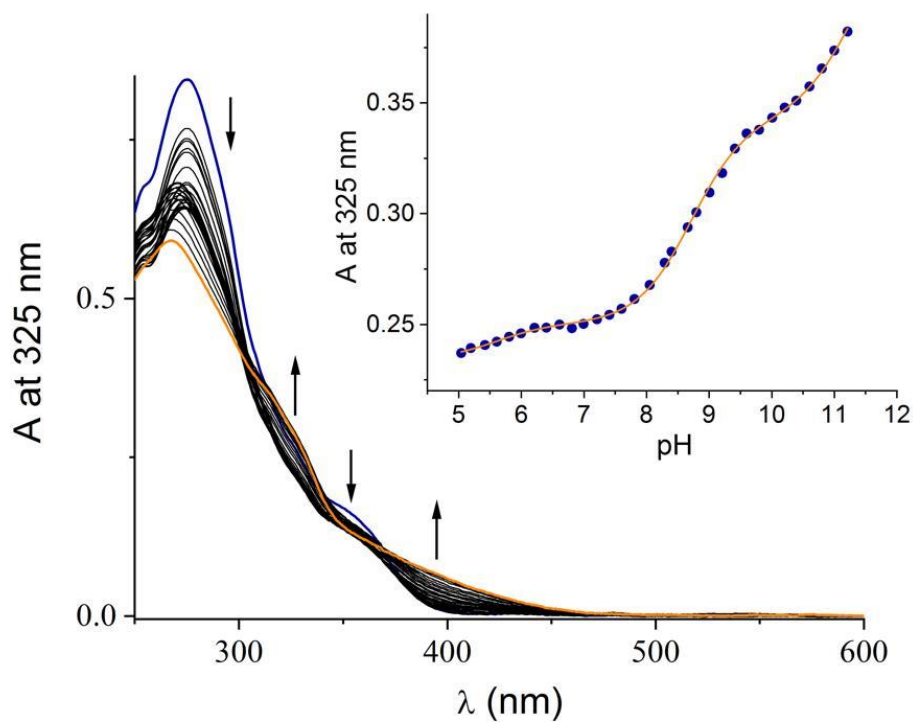

**Fig. S20.** UV-vis pH titration of a water solution of **11** [20  $\mu$ M] buffered with MOPS, MES and CAPS [10 mM] in presence of D-fructose [10 mM].

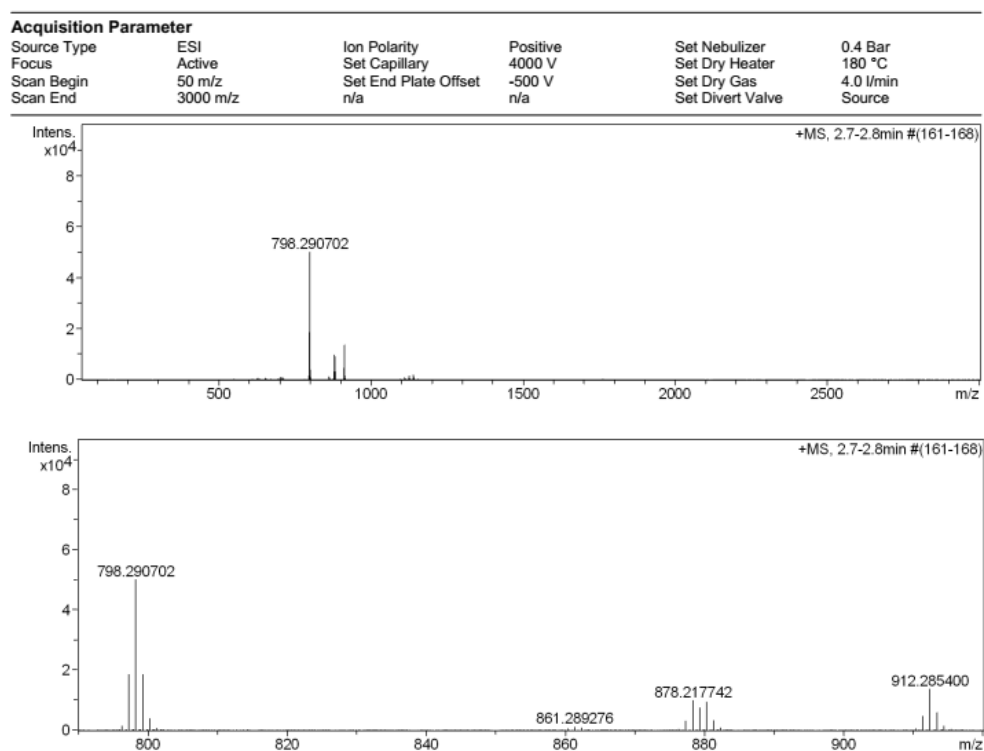

**Fig. S21.** ESI-HRMS spectra of **11** in the presence of 12 equiv. of sorbitol in aqueous methanol.

- (1) Dorazco-González, A.; Alamo, M. F.; Godoy-Alcántar, C.; Höpfl, H.; Yatsimirsky, A. K. Fluorescent Anion Sensing by Bisquinolinium Pyridine-2,6-Dicarboxamide Receptors in Water. *RSC Adv* **2014**, *4* (1), 455–466. <https://doi.org/10.1039/C3RA44363A>.
- (2) Badugu, R.; Lakowicz, J. R.; Geddes, C. D. Wavelength-Ratiometric near-Physiological PH Sensors Based on 6-Aminoquinolinium Boronic Acid Probes. *Talanta* **2005**, *66* (3), 569–574. <https://doi.org/https://doi.org/10.1016/j.talanta.2004.11.030>.
- (3) Valdes-García, J.; Zamora-Moreno, J.; Salomón-Flores, M. K.; Martínez-Otero, D.; Barroso-Flores, J.; Yatsimirsky, A. K.; Bazany-Rodríguez, I. J.; Dorazco-González, A. Fluorescence Sensing of Monosaccharides by Bis-Boronic Acids Derived from Quinolinium Dicarboxamides: Structural and Spectroscopic Studies. *Journal of Organic Chemistry* **2023**, *88* (4). <https://doi.org/10.1021/acs.joc.2c02590>.
